# Supplementary material for: Translation and Psychometric Properties of the Arabic Version of Michigan Neuropathy Screening Instrument in Type 2 Diabetes
Source: Hindawi journal article supplement (doi:10.1155/2019/2673105), 2019-03-31
Supplement: f1 [file 2673105.f1.pdf]

## نسخة المريض

## أداة متشغلان لفحص الاعتلال العصبي

التاريخ المرضي (يتم تعبئته من قبل الشخص المصاب بمرض السكري):

يرجى التكرم بالإجابة عن الأسئلة التالية حول الإحساس في ساقيك وقدميك. أجب بنعم أو لا بناءً على ما تشعر به عادة وليس بالضرورة ما تشعر به الآن. شكراً.

- |     |                                                                        |                              |                             |
|-----|------------------------------------------------------------------------|------------------------------|-----------------------------|
| 1.  | هل تشعر بخدر في ساقيك و/أو قدميك؟                                      | <input type="checkbox"/> نعم | <input type="checkbox"/> لا |
| 2.  | هل تشعر بالألم حارق (نار) في ساقيك و/أو قدميك؟                         | <input type="checkbox"/> نعم | <input type="checkbox"/> لا |
| 3.  | هل قدماك حساستان بشكل زائد للمس؟                                       | <input type="checkbox"/> نعم | <input type="checkbox"/> لا |
| 4.  | هل تشعر بتشنجات عضلية (شد عضلي) في ساقيك و/أو قدميك؟                   | <input type="checkbox"/> نعم | <input type="checkbox"/> لا |
| 5.  | هل تشعر بإحساس النمنمة (التنميل) في ساقيك و/أو قدميك؟                  | <input type="checkbox"/> نعم | <input type="checkbox"/> لا |
| 6.  | هل تشعر بالألم عندما تلمس أغطية السرير جلدك؟                           | <input type="checkbox"/> نعم | <input type="checkbox"/> لا |
| 7.  | عند الاستحمام، هل تستطيع التمييز بين الماء الحار والماء البارد؟        | <input type="checkbox"/> نعم | <input type="checkbox"/> لا |
| 8.  | هل سبق وأن أصبت بتقرح في قدمك؟                                         | <input type="checkbox"/> نعم | <input type="checkbox"/> لا |
| 9.  | هل سبق وأن أخبرك طبيبك بأن لديك الاعتلال العصبي السكري (القدم السكري)؟ | <input type="checkbox"/> نعم | <input type="checkbox"/> لا |
| 10. | هل تشعر بضعف عام أغلب الوقت؟                                           | <input type="checkbox"/> نعم | <input type="checkbox"/> لا |
| 11. | هل تزداد أعراضك سوءاً في الليل؟                                        | <input type="checkbox"/> نعم | <input type="checkbox"/> لا |
| 12. | هل تؤلمك ساقاك عندما تمشي؟                                             | <input type="checkbox"/> نعم | <input type="checkbox"/> لا |
| 13. | هل أنت قادر على الإحساس بقدميك عندما تمشي؟                             | <input type="checkbox"/> نعم | <input type="checkbox"/> لا |
| 14. | هل جلد قدميك جاف لدرجة أنه يصاب بتشققات؟                               | <input type="checkbox"/> نعم | <input type="checkbox"/> لا |
| 15. | هل سبق وأن أجريت عملية بتر؟                                            | <input type="checkbox"/> نعم | <input type="checkbox"/> لا |

المجموع:
